# Supplementary material for: Mobile health and the performance of maternal health care workers in low- and middle-income countries: A realist review
Source: PubMed Central journal article supplement — Int J Care Coord. 2018 Jun 19;21(3):73–86. doi: 10.1177/2053434518779491 (PMC6151957; doi:10.1177/2053434518779491), 2018-06-19

# mHealth and the performance of maternal healthcare workers in low and middle-income countries: a realist review

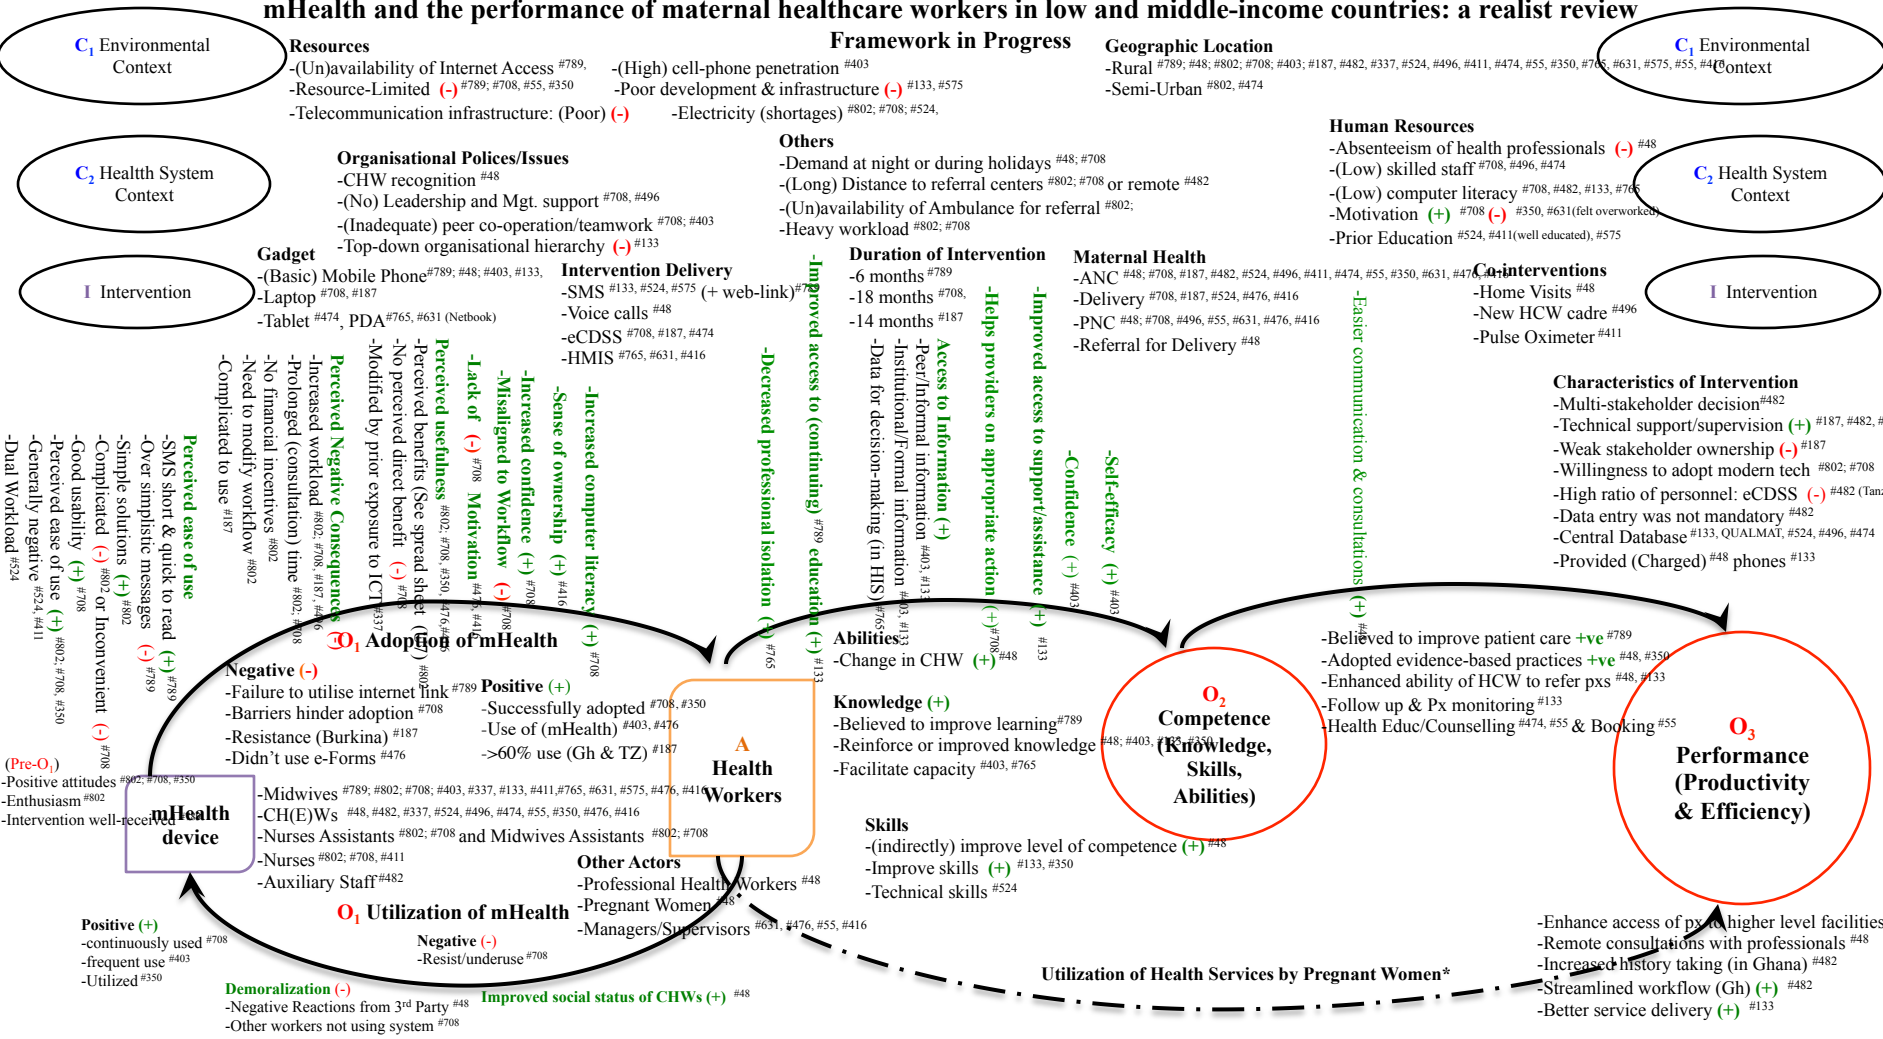

Supplement: Supplemental_material_2.pdf [file Supplemental_material_2.pdf]
